# Supplementary figures and images for: A new suprasterol by photochemical reaction of 1α,25-dihydroxy-9-methylene-19-norvitamin D3
Source: Royal Society of Chemistry journal article supplement (doi:10.1039/c5ob01896j), 2015-12-09

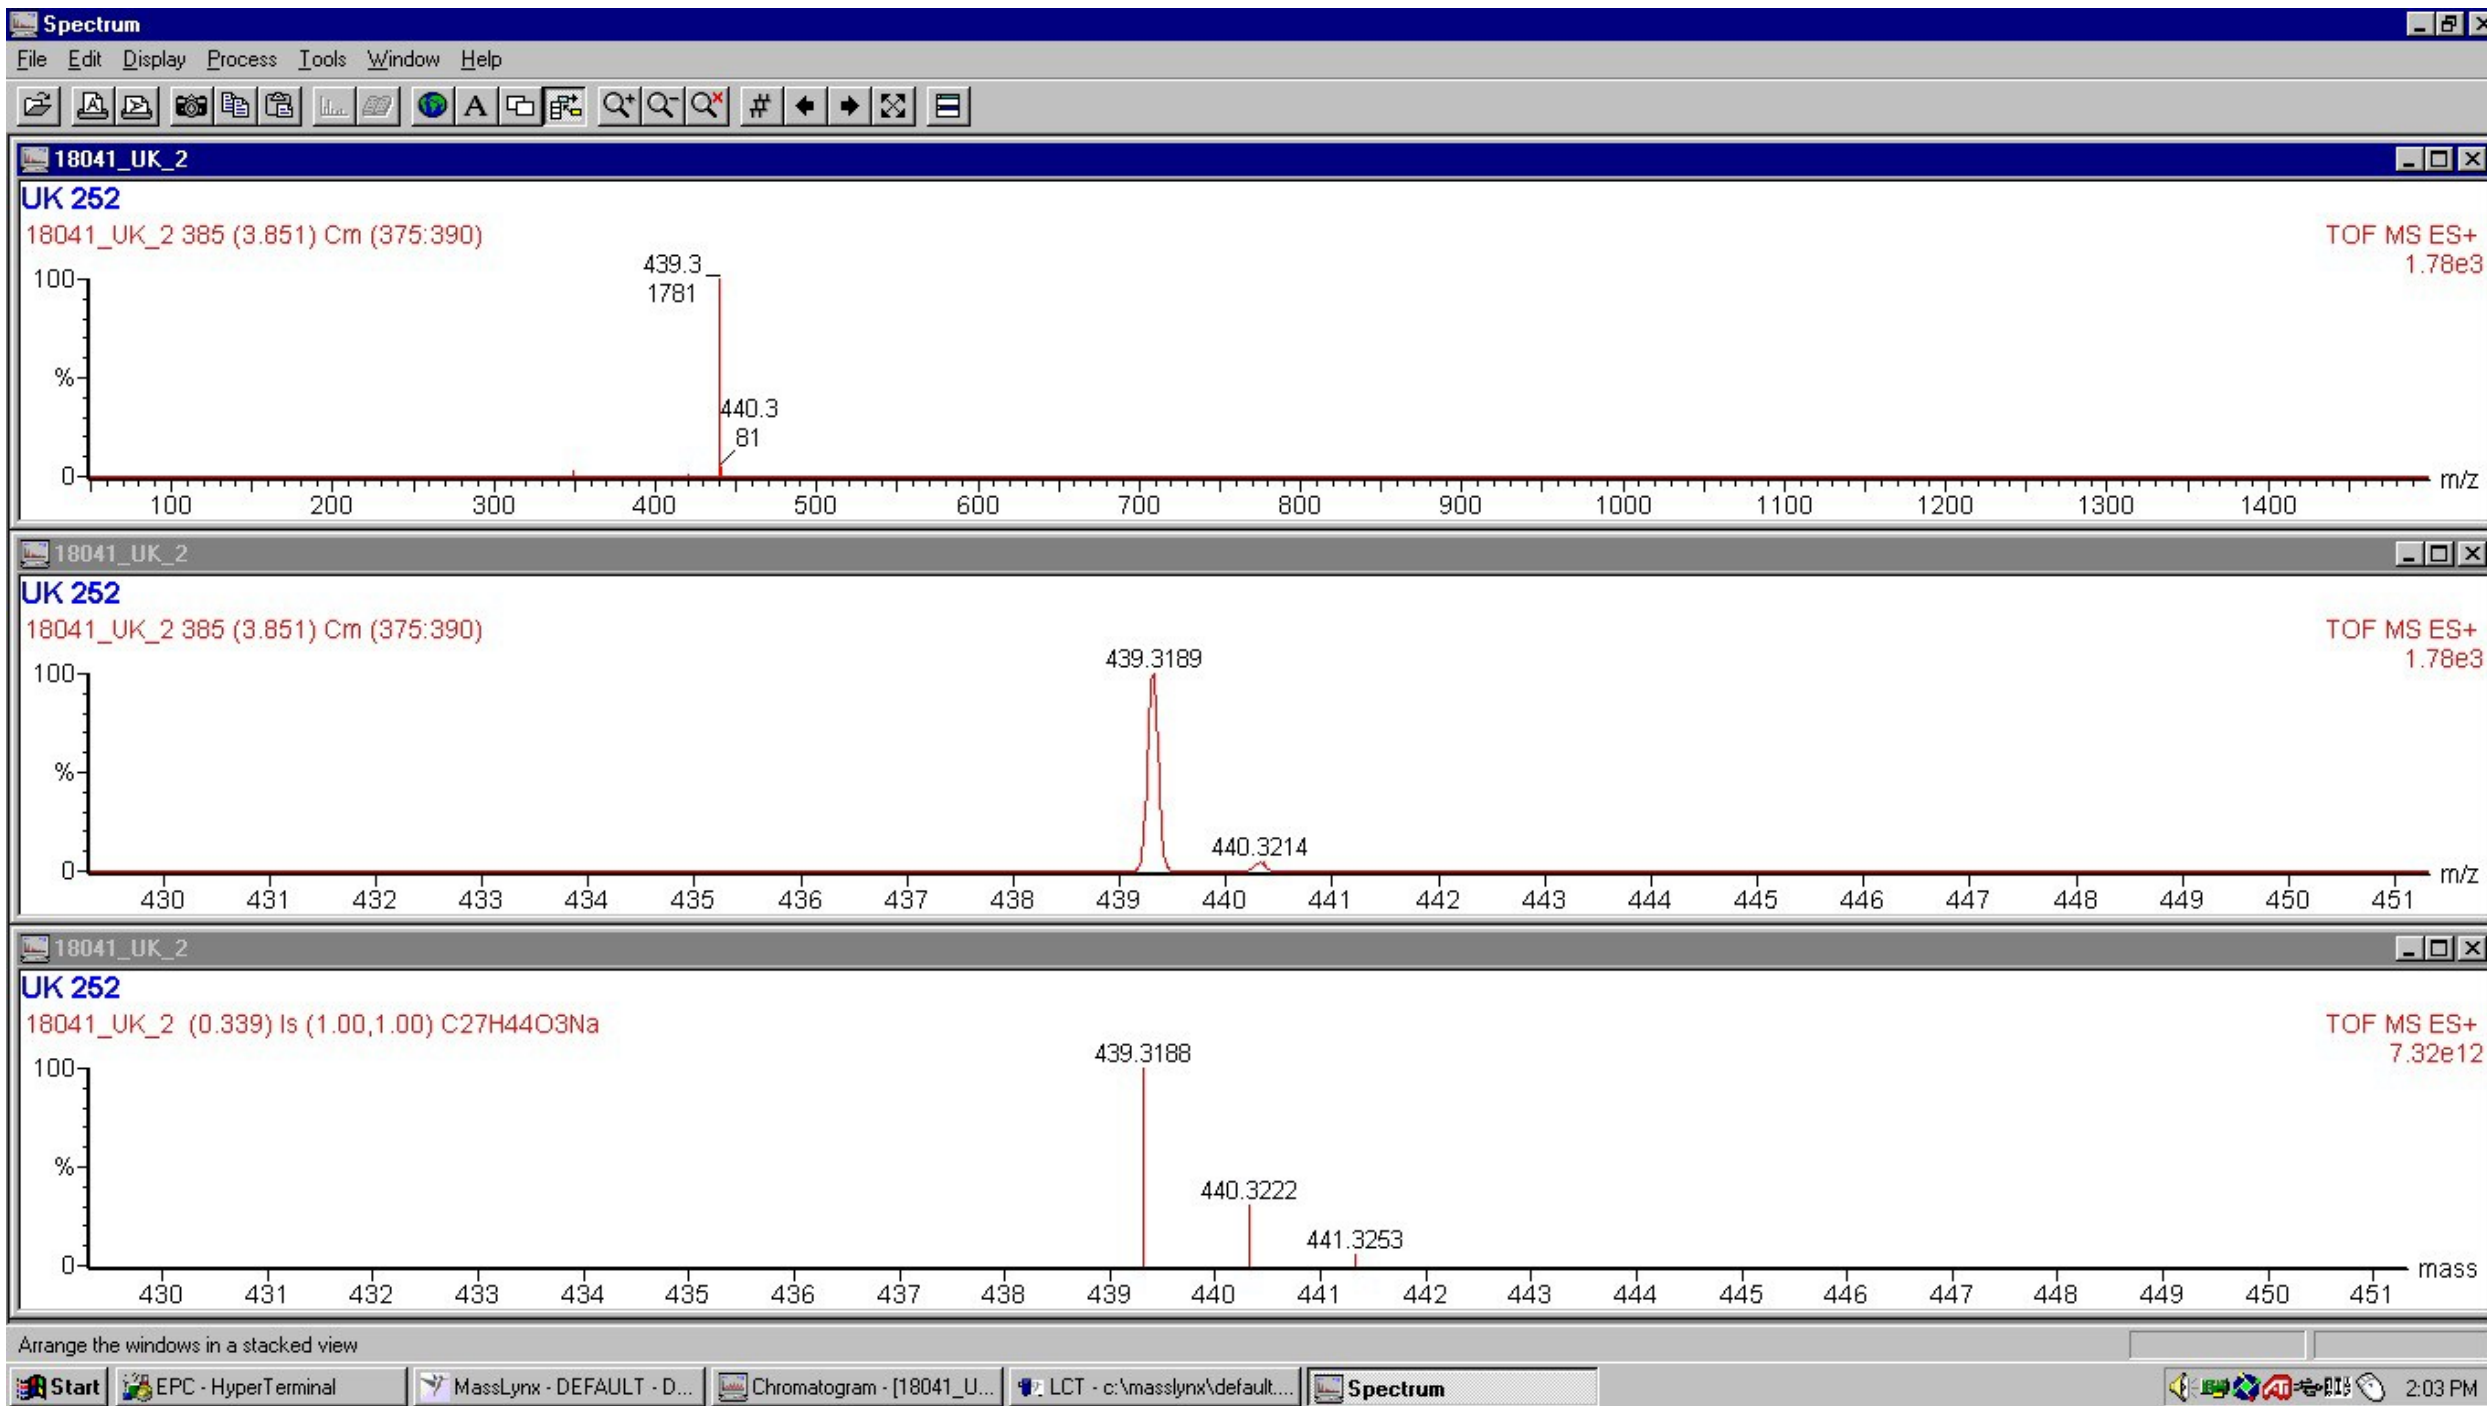

Supplement: c5ob01896j2.pdf [file c5ob01896j2.pdf]
